# Supplementary material for: Monitoring methylation-driven genes as prognostic biomarkers in patients with lung squamous cell cancer
Source: PubMed Central journal article supplement — Oncol Lett. 2019 Nov 29;19(1):707–16. doi: 10.3892/ol.2019.11163 (PMC6924172; doi:10.3892/ol.2019.11163), 2019-11-29

Figure S1. Distribution map of methylation states of the rest of the genes (A-AU). The horizontal axis represents the methylation level, the vertical axis represents the number of samples, the histogram represents the methylation states in the tumor group, and the curve represents the methylation distribution trend of the tumor group. The black line at the top represents the methylation state in the non-tumor group.

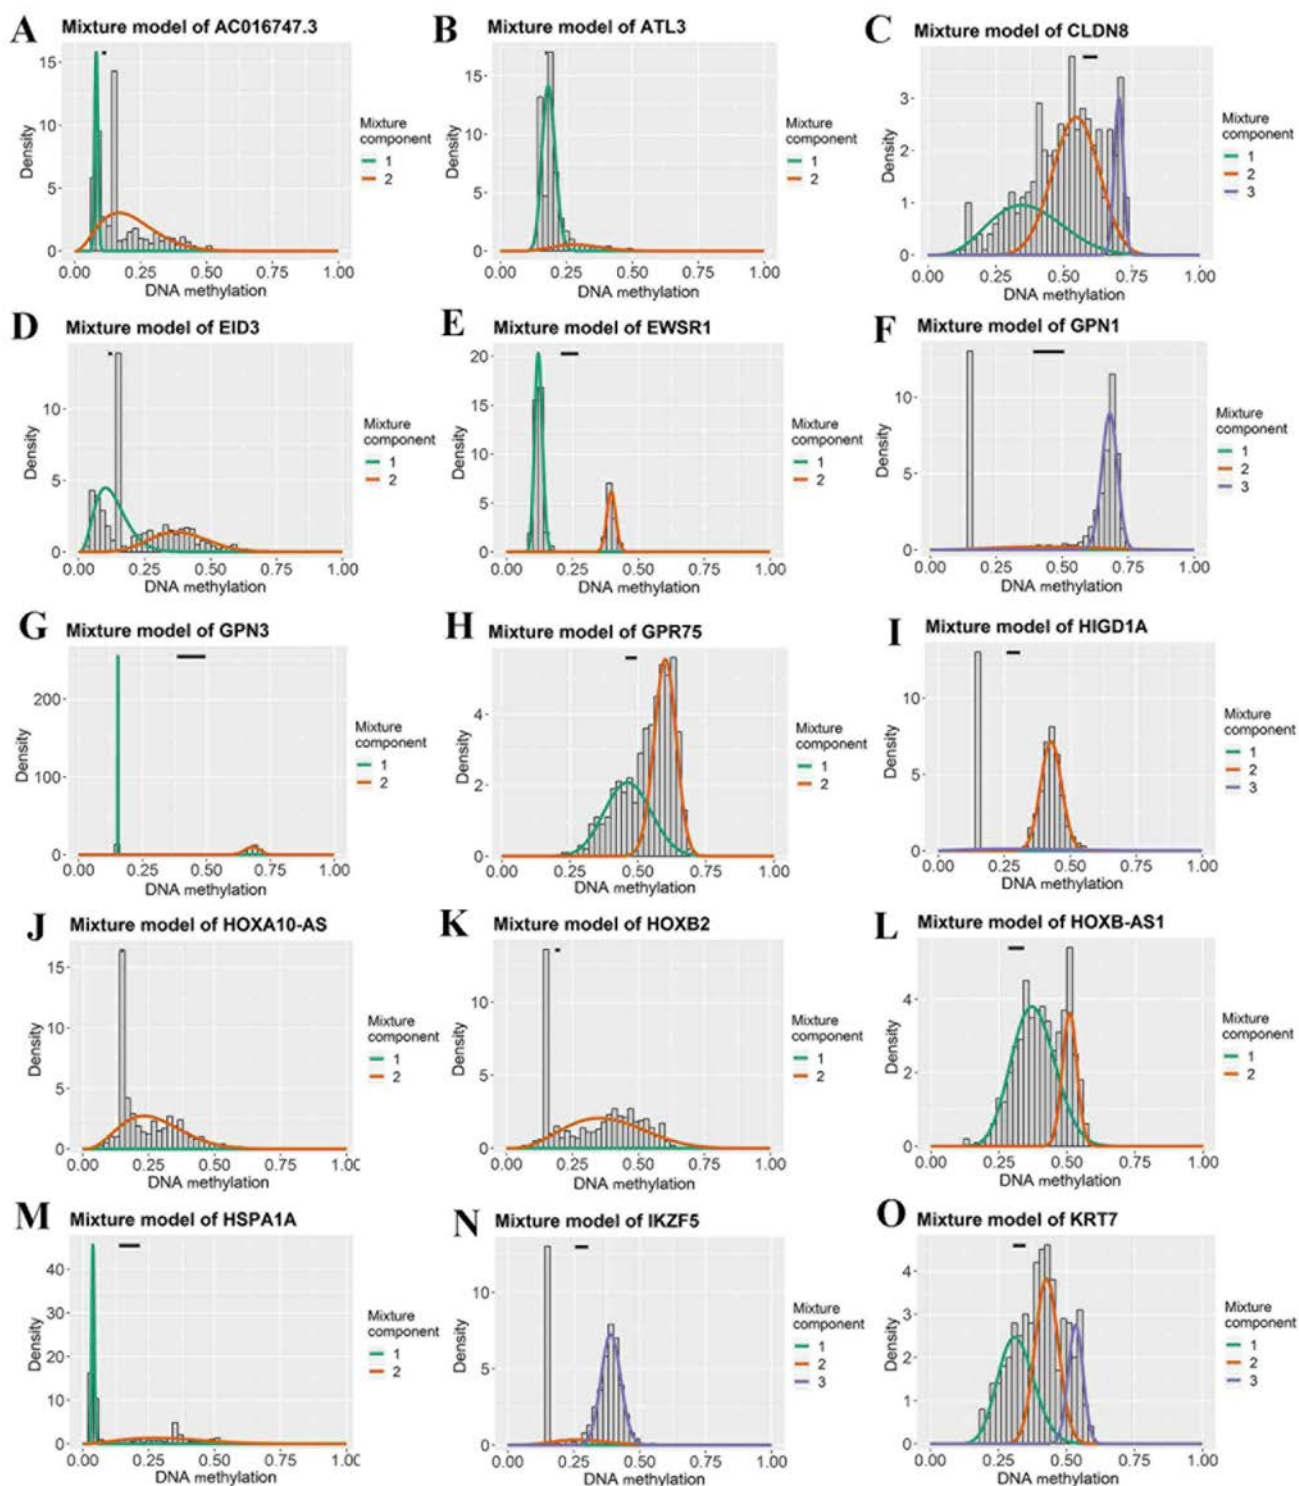

Figure S1. Continued. Distribution map of methylation states of the rest of the genes (A-AU). The horizontal axis represents the methylation level, the vertical axis represents the number of samples, the histogram represents the methylation states in the tumor group, and the curve represents the methylation distribution trend of the tumor group. The black line at the top represents the methylation state in the non-tumor group.

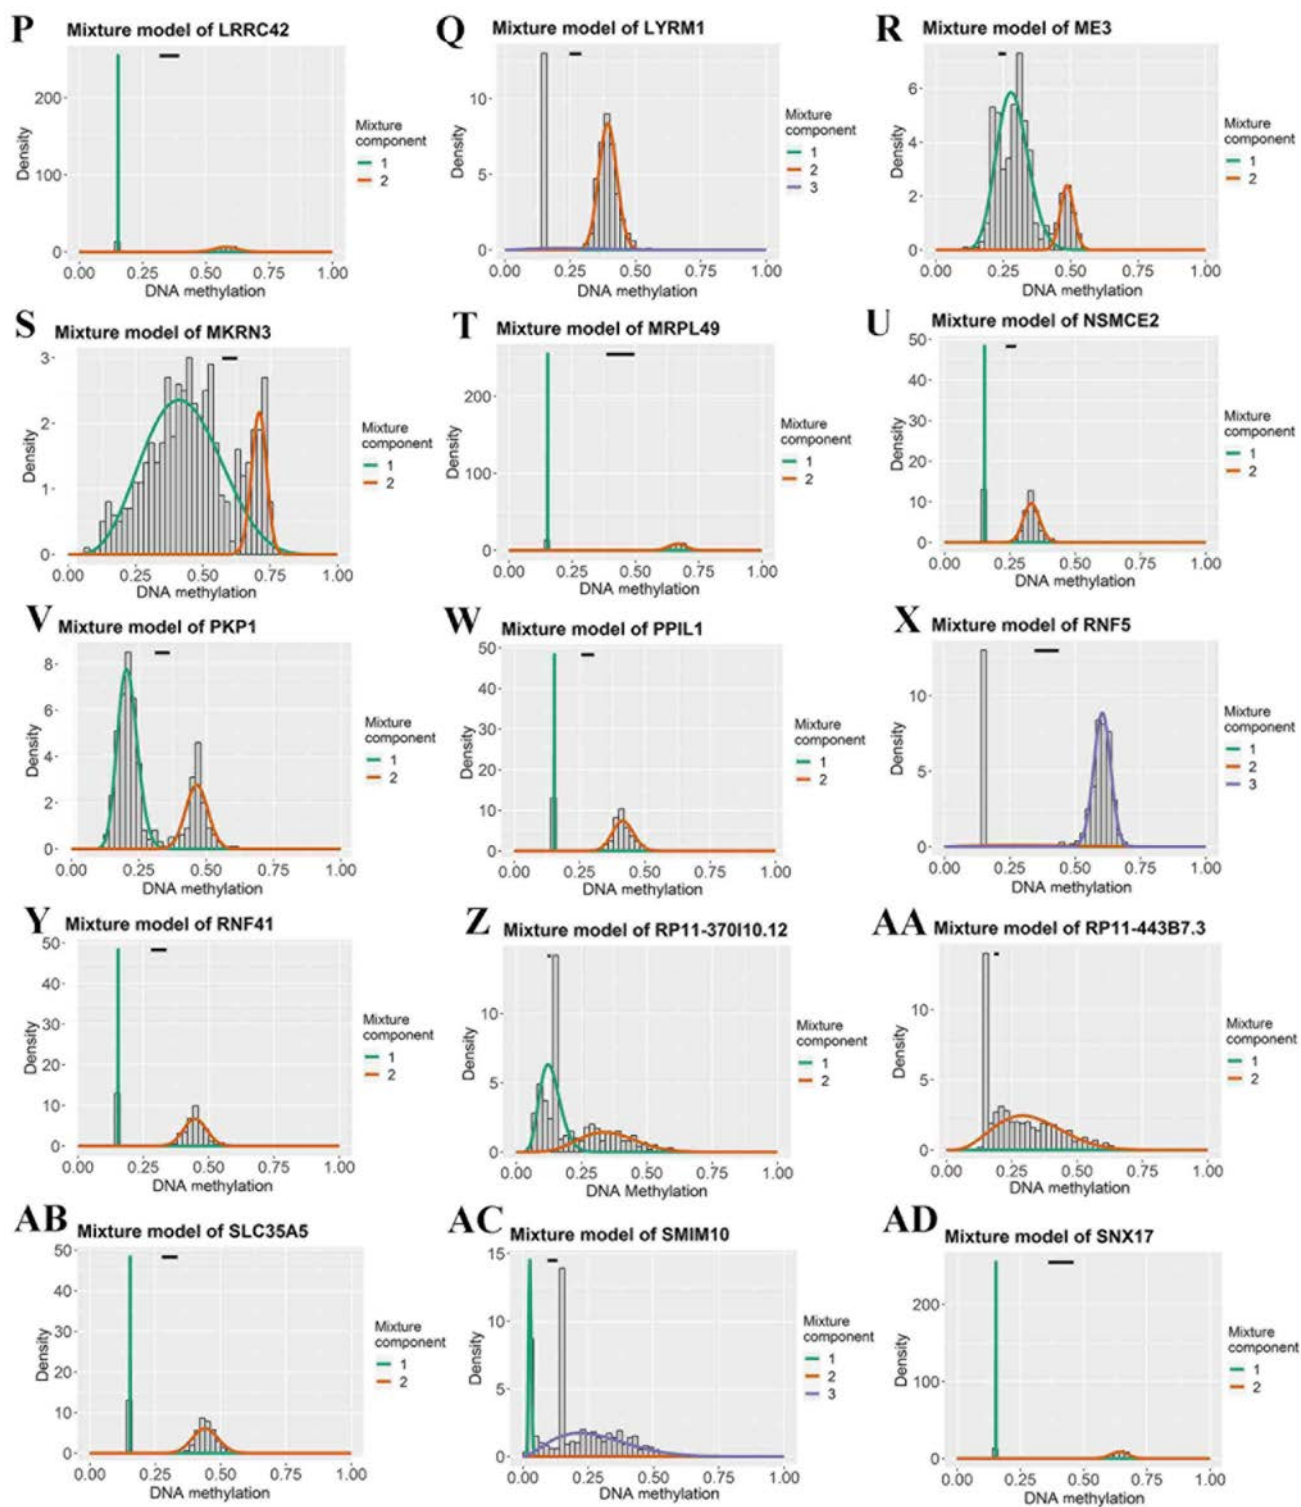

Figure S1. Continued. Distribution map of methylation states of the rest of the genes (A-AU). The horizontal axis represents the methylation level, the vertical axis represents the number of samples, the histogram represents the methylation states in the tumor group, and the curve represents the methylation distribution trend of the tumor group. The black line at the top represents the methylation state in the non-tumor group.

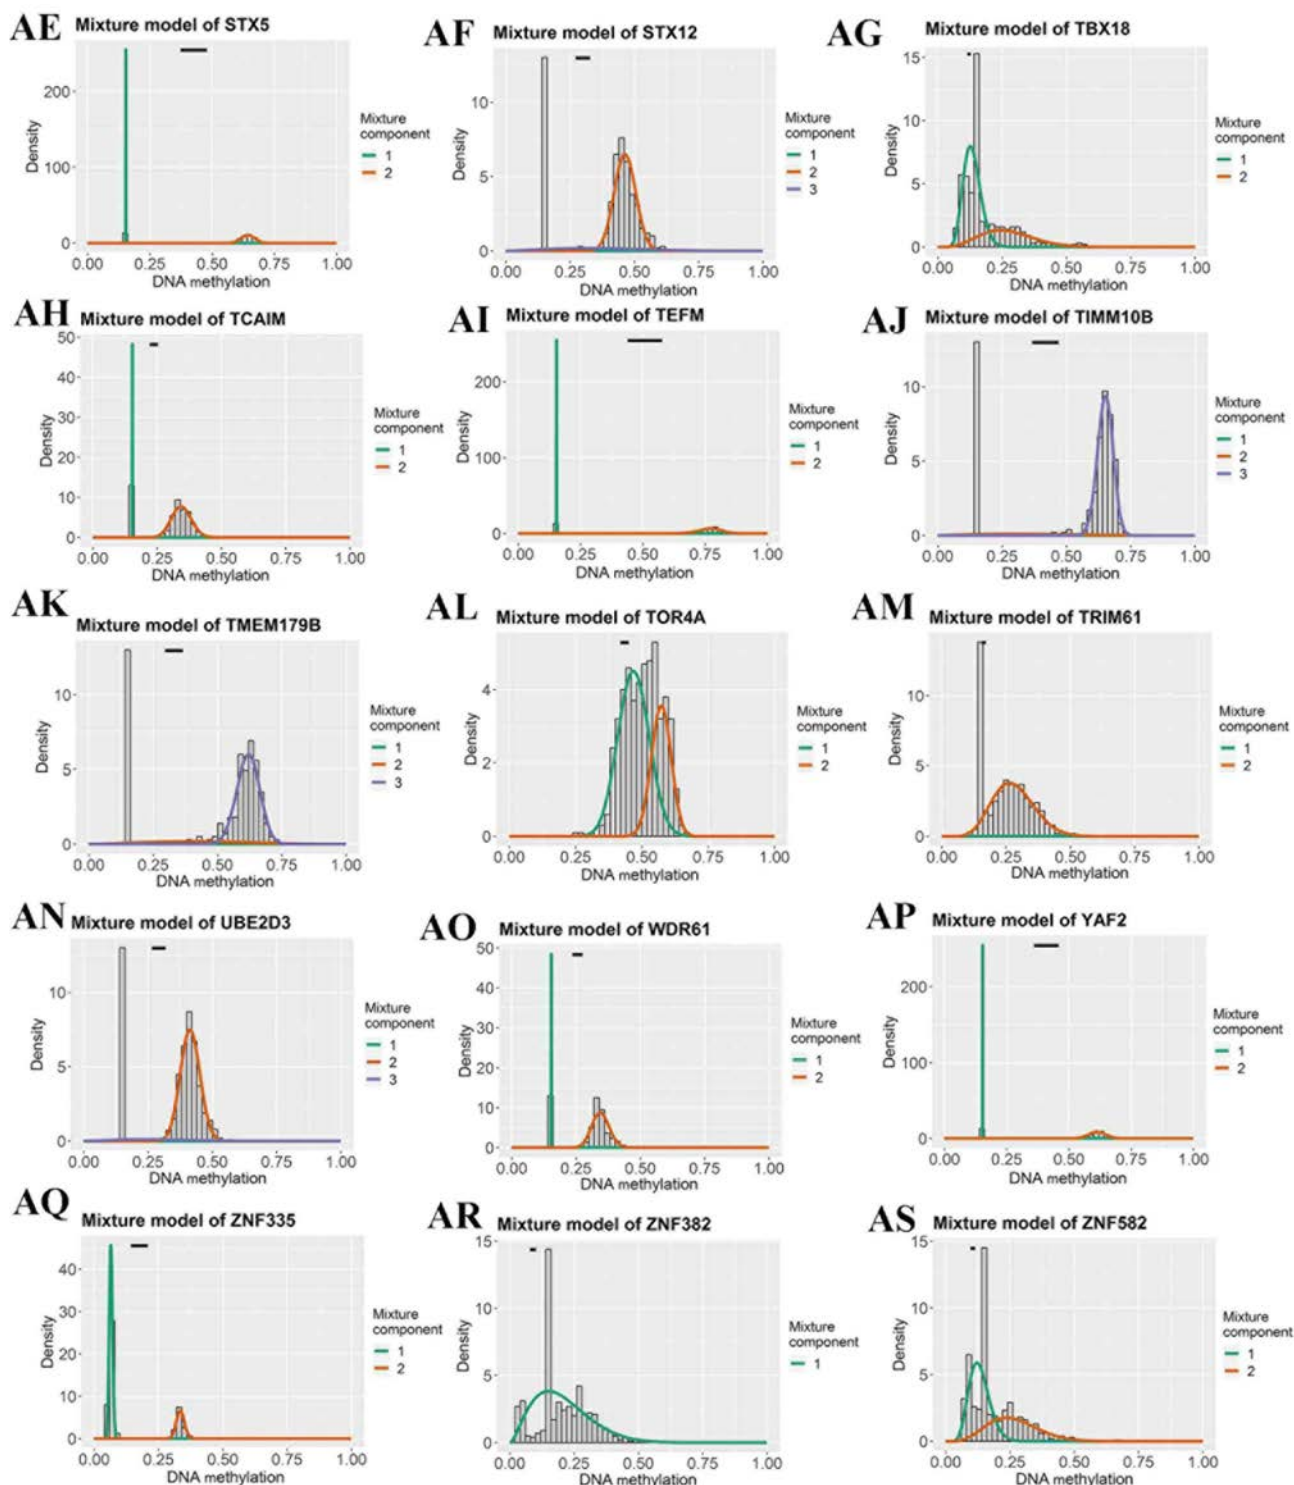

Figure S1. Continued. Distribution map of methylation states of the rest of the genes (A-AU). The horizontal axis represents the methylation level, the vertical axis represents the number of samples, the histogram represents the methylation states in the tumor group, and the curve represents the methylation distribution trend of the tumor group. The black line at the top represents the methylation state in the non-tumor group.

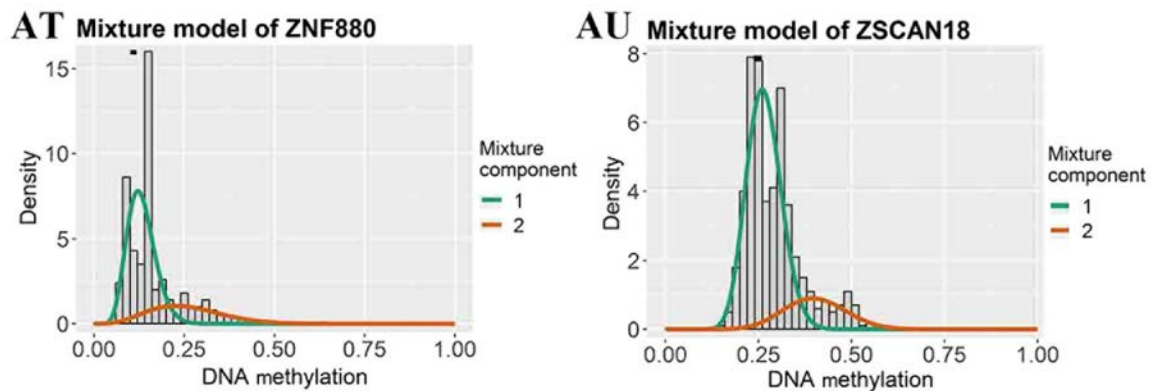

Supplement: Supplementary_Data.pdf [file Supplementary_Data.pdf]
